# Supplementary material
Source: PubMed Central journal article supplement (PMC2889556)
Supplement: 1003969107_pnas.201003969SI.pdf [file 1003969107_pnas.201003969SI.pdf]

# Supporting Information

Kuperman et al. 10.1073/pnas.1003969107

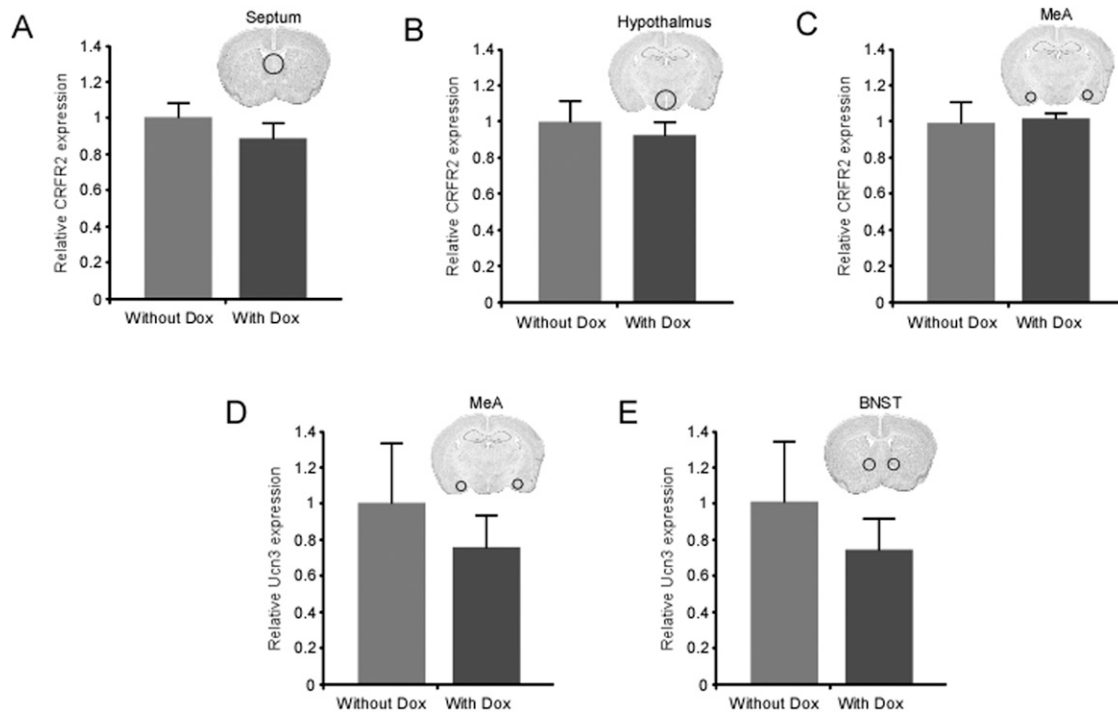

**Fig. S1.** Corticotropin-releasing factor receptor type 2 (CRFR2) and Urocortin-3 (Ucn3) mRNA levels in specific brain regions of the rostral perifornical area (rPFA)-Ucn3-overexpressing mice. CRFR2 mRNA levels in the septum (A), the hypothalamus (B), and the medial amygdala (MeA) (C) of rPFA-Ucn3-overexpressing mice were not different from the control group. Ucn3 mRNA levels in the MeA (D) and the bed nucleus of the stria terminalis (BNST) (E) also were unchanged.  $n = 7-9$  mice in each group. CRFR2 and Ucn3 mRNA levels were quantified relative to hypoxanthine-guanine phosphoribosyltransferase-1 (HPRT1) mRNA. (Inset) The punch location (modified from ref. 1).

1. Paxinos G, Franklin KBJ (2001) *The Mouse Brain in Stereotaxic Coordinates* (Academic, San Diego).

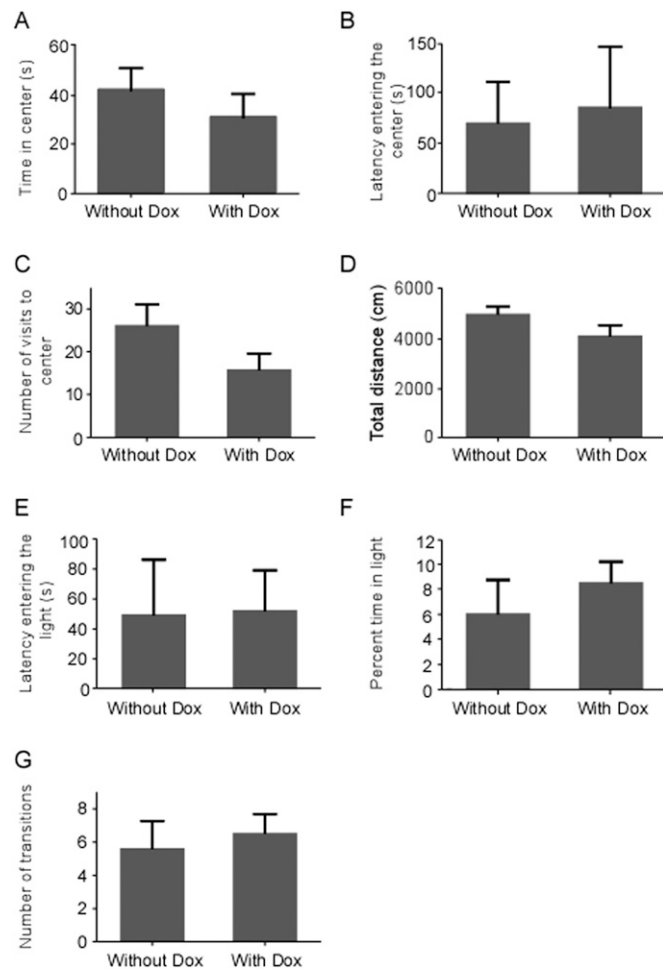

**Fig. S2.** Doxycycline (Dox) treatment in wild-type mice does not affect anxiety-like behavior. (A–D) Anxiety-like behavior of Dox-treated wild-type animals as measured by the open-field test. No significant differences were found in time spent in the center of the arena (A), latency entering the center (B), visits to the center (C), and distance traveled during the test (D). (E–G) Anxiety-like behavior as measured by the dark–light transfer test. No significant differences were found in the latency entering the light compartment (E), percentage of time spent in the light compartment (F), and number of transitions into the light compartment (G). Values are expressed as the mean  $\pm$  SEM ( $n = 8$  mice per group).



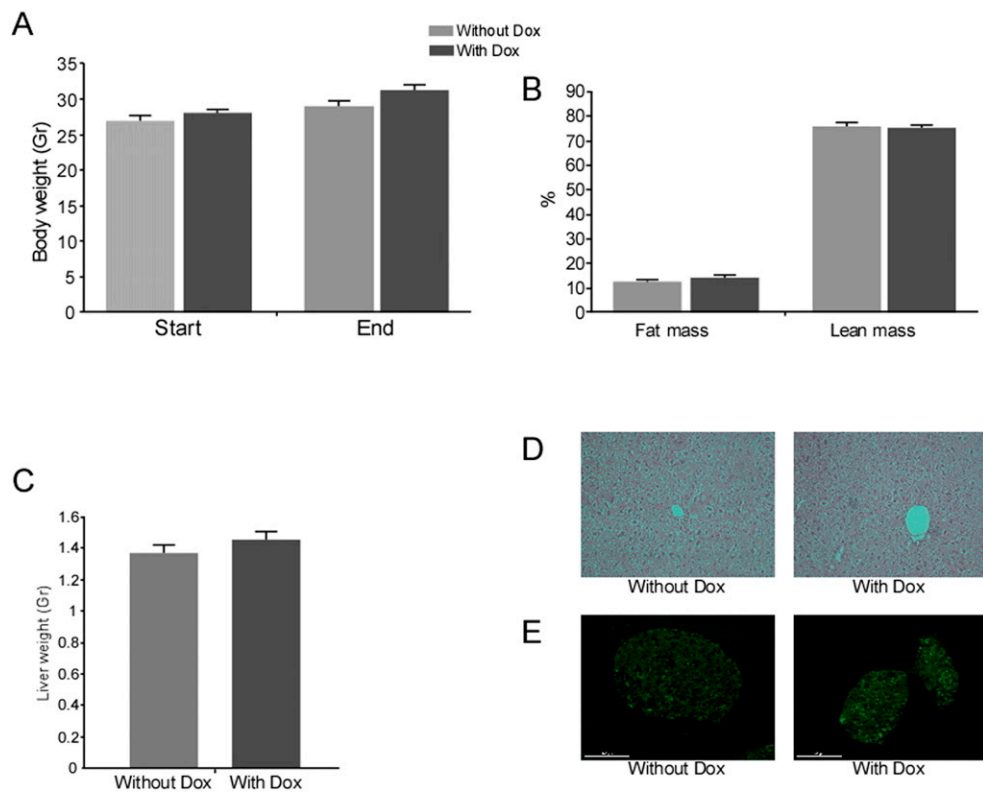

**Fig. 54.** BW and composition of the rPFA-Ucn3-overexpressing mice. (A) Mice overexpressing Ucn3 for 20 days tended to gain more weight ( $P = 0.071$ ). (B) Body composition analysis shows no significant differences in fat or lean mass. (C) Liver mass and (D) hepatic H&E staining show no overt differences in liver histology and no sign of fatty liver. (E) Pancreatic staining for insulin shows comparable  $\beta$ -islet morphology. Values are expressed as the mean  $\pm$  SEM ( $n = 5-9$  mice per group).
